# Supplementary material for: Soil organic nitrogen variation shaped by diverse agroecosystems in a typical karst area: evidence from isotopic geochemistry
Source: PeerJ. 2024 Apr 15;12:e17221. doi: 10.7717/peerj.17221 (PMC11025543; doi:10.7717/peerj.17221)
Supplement: Supplemental Information 1 [file peerj-12-17221-s001.xlsx]

## Sheet: Table S.1
Table S.1 Soil profiles description and basic characteristics in the study area
Plot	Land-use types	Depth (cm)	Disturbed mode a	Dominant vegetation b	Soil pH	Soil texture
SF	Secondary forest land	160	None	Platycarya strobilacea Sieb.et Zucc. (C3), Melia azedarach L. (C3), Quercus fabri Hance (C3), etc.	7.50±0.40	Silt and silt loam
AC	Abandoned cropland	130	Long term cultivation (abandoned before 3 years)	Corn (C4) and potatoes (C3)	5.00±0.20	Silt loam
GS	Shrubland	70	Goats grazing in 5 years	Pyracantha fortuneana, (C3), Castanea mollissima, (C3), Lindera communis, and interspersed with less Cunninghamia lanceolata, (C3), Pinus massoniana Lamb (C3), etc.	6.65±0.35	Silt and silt loam
a The information of longitude, latitude and altitude has been reported by Han et al. (2023b) and Han and Xu (2022).
b Dominant vegetation in the sampling area has been reported byHan et al. (2023a).
