# Supplementary material for: Soil organic nitrogen variation shaped by diverse agroecosystems in a typical karst area: evidence from isotopic geochemistry
Source: PeerJ. 2024 Apr 15;12:e17221. doi: 10.7717/peerj.17221 (PMC11025543; doi:10.7717/peerj.17221)
Supplement: Supplemental Information 2 [file peerj-12-17221-s002.xlsx]

## Sheet: Sheet1
Table S.2 SON contents, δ15NSON compositions, ratios of SOC/SON in the Yinjiang County
Profile sites	Depth	pH	Clay	Silt	Sand	SON	δ15NSON	SOCa/SON
			(%)	(%)	(%)	(%)	(‰)
SF profile	0	7.2	13.58	83.97	2.45	0.23	4.35	18.13
	5	7.7	14.34	84.31	1.35	0.13	5.81	13.38
	10	7.7	13.38	84.74	1.88	0.12	6.97	13.56
	15	7.7	14.68	84.34	0.98	0.11	6.63	11.69
	20	7.7	12.92	85.79	1.29	0.09	7.53	9
	30	7.7	14.41	84.46	1.13	0.09	7.59	8.48
	40	7.9	15.41	83.92	0.67	0.09	7.18	8.81
	50	7.9	13.99	85.07	0.94	0.1	6.99	9.17
	60	7.8	14.09	84.93	0.99	0.08	6.9	8.49
	70	7.5	15.99	83.3	0.72	0.09	7.54	8.34
	80	7.7	14.55	84.82	0.63	0.06	6.79	7.64
	90	7.5	12.38	86.7	0.92	0.06	6.63	6.31
	100	7.3	12.6	86.54	0.86	0.06	7.56	8.14
	110	7.3	12.66	85.79	1.55	0.06	7.32	7.01
	120	7.2	11.83	87.65	0.52	0.06	7.27	6.77
	130	7.1	11	87.9	1.09	0.07	6.45	5.6
	140	7.1	10.56	88.42	1.02	0.09	6.75	6.68
	150	7.2	9.07	88.96	1.97	0.09	6.51	5.21
	160	7.3	8.71	89.88	1.41	0.08	7.11	6.28
AC profile	0	4.8	10.12	75.46	14.43	0.22	3.79	8.05
	5	4.8	15.16	72.77	12.08	0.1	4.77	7.27
	10	4.9	14.05	75.12	10.83	0.1	5.46	6.78
	15	4.8	12.94	68.65	18.42	0.08	5.15	7.08
	20	5	14.1	75.28	10.63	0.09	5.98	6.8
	30	5.1	14.3	75.84	9.87	0.09	6.08	6.65
	40	5.1	16.12	75.86	8.02	0.09	6.47	6.33
	50	5	16.26	75.49	8.25	0.09	6.64	6.25
	60	5.1	17.9	74.49	7.61	0.08	6.19	6.78
	70	4.8	16.23	78.19	5.58	0.11	6.33	6.47
	80	4.8	17.04	77.3	5.66	0.11	6.46	6.89
	90	4.9	17.4	78.42	4.18	0.1	6.62	6.8
	100	4.9	16.37	79.63	4	0.1	6	8.15
	110	5.2	14.74	73.31	11.95	0.08	6.69	6.68
	120	5.1	17.82	73.61	8.57	0.11	7.23	4.81
	130	5.1	17.47	72.5	10.03	0.08	6.98	6.44
GS profile	0					0.63	1.87	17.18
	5	6.3	10.45	85.99	3.56	0.58	2.92	12.1
	10	6.3	10.79	85.93	3.28	0.43	2.9	11.24
	15	6.4	12.16	85.1	2.75	0.39	4.21	10.01
	20	6.5	12.13	85.56	2.31	0.29	4.4	9.53
	30	6.6	13.33	84.35	2.32	0.23	5.36	8.36
	40	6.8	13.3	84.24	2.46	0.13	6.23	7.82
	50	7	12.87	85.26	1.87	0.12	6.14	7.01
	60	7	11.36	86.96	1.68	0.12	7.08	6.11
	70	7	12.39	83.9	3.71	0.13	6.73	7.18
a The SOC contents has been reported by (Han et al., 2023a)
